1 **A quasi-experimental study to compare effectiveness of a breastfeeding arm**  
2 **sling with normal breastfeeding cross-cradle hold position**

3 **Short-Title: The effectiveness of a newly designed breastfeeding arm sling**

4  
5 Author details:

6 Pornsri Disorntatiwat<sup>1</sup>, Mary Steen<sup>2\*</sup>, Sudjit Liblub<sup>1</sup>

7 <sup>1</sup> Ramathibodi School of Nursing, Faculty of Medicine Ramathibodi Hospital, Mahidol  
8 University, Thailand

9 <sup>2</sup> Department of Nursing, Midwifery and Health, Faculty of Health and Life Sciences,  
10 University of Northumbria, The United Kingdom

11

12 \*Corresponding author

13 E-mail: [mary.steen@northumbria.ac.uk](mailto:mary.steen@northumbria.ac.uk)

14

15 All authors contributed to the study design, data analysis and writing the article.

16 PD and SL managed the data collection process in Thailand.

17

18

19

20

21

22

23

24

25 **NOTE: This preprint reports new research that has not been certified by peer review and should not be used to guide clinical practice.**

26

27

## 1 **Abstract**

2 Breastfeeding has many benefits for the newborn and mother therefore, the World  
3 Health Organization guidelines recommend exclusive breastfeeding for the first 6  
4 months, with continued breastfeeding for up to two years. However, exclusive  
5 breastfeeding rates in the first 6 months in Thailand were reported to be approximately,  
6 14% in 2019. Research has highlighted that many mothers' have a lack of belief in  
7 their ability to breastfeed, and some physical conditions, such as tiredness and  
8 difficulty continually holding their baby in a comfortable position. Additionally, first-time  
9 breastfeeding can contribute to mothers having difficulties breastfeeding during the  
10 early postnatal period. Therefore, the *Arm sling innovation* (device) has been designed  
11 to provide support and comfort whilst holding the newborn. This study compared the  
12 effectiveness of the breastfeeding arm sling innovation to support breastfeeding in  
13 cross-cradle hold position and normal cross-cradle hold position breastfeeding in first-  
14 time mothers. A quasi-experimental pretest-posttest research design was used to  
15 evaluate the effectiveness of breastfeeding before and after the intervention among  
16 first-time mothers in the postnatal unit, at Ramathibodi hospital, Thailand. A total of 46  
17 postpartum mothers participated in the study. The results showed that the  
18 effectiveness of breastfeeding reported by mothers between using a normal cross-  
19 cradle hold position and using breastfeeding arm sling innovation was statistically  
20 significantly different ( $t = 4.32, P < 0.001$ ) with helping to hold the baby securely without  
21 slipping ( $t=5.68, p<0.001$ ) and mothers can continue to breastfeed ( $t=2.09, p <0.001$ ).  
22 Majority of mothers were satisfied with the support of using the breastfeeding arm sling  
23 innovation design. The breastfeeding arm sling innovation contributes to the  
24 effectiveness of breastfeeding by assisting and supporting the mother and baby's

25 position to breastfeed more comfortably, thus assisting first-time mothers to feel

26 comfortable, confident, and able to continue breastfeeding.

27

## 28 Introduction

29 The benefits of breastfeeding for babies are well established as breast milk is  
30 naturally produced, safe, clean, provides complete nutrition, and contains antibodies  
31 that help protect against many common childhood illnesses [1]. Breastfeeding  
32 increases the bonding between a mother and her infant and also self-esteem for  
33 mothers from the experience [1]. Therefore, the World Health Organization has  
34 recommended that infants should be exclusively breastfed for the first six months of  
35 life and to continue breastfeeding for up to two years and beyond [2].

36 Despite the many benefits of breastfeeding, rates in Thailand remain low.  
37 World Health Organization guidelines and, also the most recent national report in  
38 Thailand have reported that the six months exclusive breastfeeding rate was  
39 approximately 14% in Thailand in 2019 [3]. According to the Ten Steps to Successful  
40 Breastfeeding, postpartum women should facilitate immediate initiation of  
41 breastfeeding, i.e., within the first hour after birth, and then attempt to breastfeed  
42 every 2–3 hours with a goal of eight sessions per 24-hour period to stimulate  
43 prolactin hormone to increase milk production [2,4]. However, there are a lot of  
44 factors that contribute to inadequate breastfeeding such as maternal discomfort  
45 which is frequently experienced by mothers during the breastfeeding period [5].  
46 Previous research has found that many mothers have a lack of belief in their ability  
47 to breastfeed, and some physical conditions and tiredness can also contribute to  
48 them having difficulties breastfeeding during the early postnatal period [6].  
49 Additionally, other problems can contribute to the first-time mothers' inability to  
50 breastfeed their newborns, and some have reported feeling that they have  
51 insufficient milk and difficulties latching, thus leading to shortening the duration of

52 breastfeeding [7]. It is important to note that breastfeeding experiences can vary  
53 considerably between first-time and previously breastfed mothers [8].

54           Positioning of the baby's body and correct latching on of the baby is essential  
55 for good attachment and successful breastfeeding [9]. A cross-cradle hold position  
56 helps to guide the baby's head and mouth while feeding and can help to avoid poor  
57 latching, which can cause nipple redness and/or cracking [10]. It has been reported  
58 that this position is preferred by new mothers who have little experience regarding  
59 breastfeeding or for babies who have not learned how to latch on the breast well  
60 [11]. Therefore, the midwife's role involves helping mothers and providing support,  
61 such as guidance and counseling on practical concerns like breastfeeding positions  
62 and how to make mothers feel comfortable and thus promote longer duration of  
63 breastfeeding [12]. Signs that a baby is well attached during breastfeeding include  
64 holding the baby so that their face touches the mother's breast, their head and body  
65 in alignment with the mother's breast, their mouth wide open, and more of the areola  
66 is visible above the baby's top lip than below the lower lip, as according to the four  
67 key signs for effective breastfeeding [2]. However, all these signs can lead to a  
68 mother feeling over-tired and can make her wrist and arm become uncomfortable  
69 and cause an aching sensation during breastfeeding.

70           Currently, there are several aids to help mothers breastfeed, for example, a  
71 functional nursing bra and a specifically designed supporting pillow; these aids can  
72 help mothers to continue breastfeeding. However, local new mothers have  
73 expressed how they find it difficult to continually hold their baby in a comfortable  
74 position and that their arm often aches during breastfeeding. The mothers'  
75 experiences have been observed by the midwifery researchers and issues during  
76 breastfeeding such as, incorrect feeding position, extreme tiredness, and wrist pain

77 have been identified whilst working in the postnatal unit at the local hospital  
78 (Ramathibodi Hospital). Therefore, there is a justification to find new ways to help  
79 and support first-time mothers to breastfeed comfortably and reduce the risk of wrist  
80 and arm pain as well as increase self-esteem for the mothers who choose to  
81 breastfeed.

## 82 **Definition of the methods of breastfeeding position**

- 83 - Normal breastfeeding position is a normal cross-cradle hold position breastfeeding
- 84 with a pillow support
- 85 - Breastfeeding arm sling innovation is the intervention to attach the mother's arm
- 86 whilst holding her baby to breastfeed in a cross-cradle hold position with a pillow
- 87 support

## 88 **Aim and Objectives**

- 89 - To compare the effectiveness of the breastfeeding arm sling innovation to support
- 90 breastfeeding in cross-cradle hold position and normal cross-cradle hold position
- 91 breastfeeding in first-time mothers.
- 92 - To evaluate the satisfaction with the breastfeeding arm sling innovation to
- 93 support breastfeeding in cross-cradle hold position in first-time mothers
- 94 The null hypothesis was that there is no difference in the mean scores for the
- 95 effectiveness of breastfeeding between using breastfeeding arm sling innovation
- 96 and breastfeeding in normal cross-cradle hold position.

## 97 **Materials and Methods**

98 A quasi-experimental pretest-posttest research design was used to evaluate  
99 scores on the effectiveness of breastfeeding before and after using the breastfeeding

100 arm sling innovation. This study design was chosen to undertake a comparison of  
101 the scores after an intervention to scores on the same measure in the same  
102 participants prior to the intervention [12]. Firstly, researchers designed and  
103 developed the breastfeeding arm sling innovation and conducted a pilot test of the  
104 innovation. Secondly, the researchers explained study information in a step-by-step  
105 approach guided by a research protocol and specific requirements of assessment to  
106 midwives (research assistants) for approximately, 30-60 minutes. The midwives  
107 demonstrated how they would undertake an assessment to confirm correct  
108 procedure.

109 Mothers who meet the inclusion criteria were invited to participate in the  
110 study. Mothers were informed about the purpose of the study and given an  
111 opportunity to discuss the study to make an informed choice to participate. Mothers  
112 were asked to complete a written consent form.

113 The experiment involved two stages (Fig 1). In the first stage, mothers were  
114 selected to provide 15 minutes of breastfeeding by using a cross-cradle hold position  
115 with the breastfeeding arm sling innovation or a normal cross-cradle hold position.  
116 As it is a clinical practice to wrap a baby (swaddle) to prevent hypothermia in the  
117 newborn in the postnatal unit at the study hospital [13-14], the babies in this  
118 experiment were wrapped in both groups (using a cross-cradle hold position with the  
119 breastfeeding arm sling innovation or a normal cross-cradle hold position), see Fig 1.

120 **Fig. 1. This is the Fig 1 Title. The experimental flowchart.**

121 In the case of breastfeeding with a normal cross-cradle hold position, the  
122 midwives (research assistants) helped the mother to provide 15 minute-  
123 breastfeeding. The midwives (research assistants) observed and measured the



124 effects of breastfeeding. In the case of breastfeeding with a cross-cradle hold  
125 position with the breastfeeding arm sling innovation, the midwives (research  
126 assistants) helped the mother to wear the sheath of the breastfeeding arm sling  
127 innovation and wrap the equipment around the baby. When the baby was latched on  
128 the midwives helped the mother to adhere the equipment for a firm hold. Following  
129 this, the mother provided 15-minute breastfeeding. The midwives observed and  
130 measured the effectiveness of breastfeeding. After breastfeeding, mothers were  
131 asked to complete the effectiveness of breastfeeding and satisfaction of using  
132 breastfeeding arm sling innovation questionnaires.

133 The following stage was undertaken three hours later, and 15-minute-  
134 breastfeeding was repeated (normal cross-cradle hold position or breastfeeding arm  
135 sling innovation with cross-cradle hold position) follow-up on the effectiveness of  
136 breastfeeding and satisfaction levels outcomes were assessed.

## 137 **Participants and setting**

138 This study was conducted in the postnatal unit, at Ramathibodi hospital,  
139 Thailand. Two hours after giving birth, mothers were transferred to the postnatal unit  
140 and provided with care and support. It is normal practice for healthy mothers and  
141 their newborn babies to be discharged home from the postnatal unit within 48-72  
142 hours. In this unit, assistance with breastfeeding during the postpartum period is  
143 provided by nurse-midwives. Research assistants, thus, are nurse-midwives who are  
144 healthcare providers in the postnatal unit, having knowledge of assessing and  
145 observing breastfeeding behaviour. Breastfeeding assistance can vary according to  
146 the nurse-midwife that provides the care. Therefore, during the undertaking of this

147 study, the nurse-midwife who supported a mother to breastfeed continued to be the  
148 same person, in order to control for any breastfeeding effect.

## 149 **The structured questionnaire**

150 The effectiveness of breastfeeding was recorded by a questionnaire for  
151 participants and midwife assessors that was modified from the four-key points (The  
152 Breastfeed Observation), which aligned with the key signs to effective breastfeeding.  
153 Questions were related to the four key points of the baby's position: baby's head and  
154 body in line, baby held close to mother's body, baby faces the breast with nose  
155 opposite the nipple, baby's whole body supported [2].

156 Additionally, observations relating to good attachment: more areola seen above  
157 baby's top lip, baby's mouth open wide, lower lip turned outwards and baby's chin  
158 touches breast were considered. The participants self-reported these effective  
159 breastfeeding signs, and the midwives observed these signs. Both questionnaires  
160 included five items that utilised a ranked 5-point Likert-type scale to assess the  
161 effectiveness of breastfeeding outcomes.

162 The breastfeeding arm sling innovation satisfaction questionnaire was  
163 developed by the researchers and adapted from the diffusion of innovation model,  
164 which demonstrates innovation is generally adopted when four relative advantages  
165 are considered i.e., compatibility, complexity, trial-ability, and observability [15]. The  
166 questionnaire includes 14 items ranked on a 5-point scale from lowest satisfaction to  
167 the highest level of satisfaction. The face and content validity were tested through  
168 consultation with a panel of three experts, including maternal-newborn and midwifery  
169 experienced researchers from the Ramathibodi School of Nursing, Mahidol University.  
170 The structure of the questionnaire also included open-ended questions and sought

171 qualitative information regarding using the breastfeeding arm sling innovation to  
172 explore what participants views were and report their thoughts in their own words [16].

## 173 **Sample size calculation**

174 The sample size was calculated based on a pilot study involving 5 mothers that  
175 were undertaken in the same setting to test the study feasibility (SD. = 1.2). According  
176 to the formula to calculate the sample size, considering an alpha error of 0.05, Delta  
177 0.5, and a test power of 80%, under one tail hypothesis, the sample size of 46 mothers  
178 was required to participate [17].

## 179 **Data collection**

180 Recruitment and data collection were undertaken in the postnatal unit on a daily  
181 basis, by a research assistant, who recruited participants and implemented the  
182 assignment of the intervention. A midwife (research assistant) supported and advised  
183 a mother how to breastfeed using the cross-cradle holding position and how to use the  
184 breastfeeding arm sling innovation. The mothers who met the inclusion criteria were  
185 asked to assess their breastfeeding effectiveness before the intervention. After the  
186 breastfeeding intervention (15 minutes), the mothers were asked to assess their  
187 breastfeeding effectiveness and measure self-reported satisfaction. The midwives  
188 (research assistants) observed and completed the effectiveness of the breastfeeding  
189 questionnaire in both normal breastfeeding and during the intervention.

## 190 **Intervention**

191 The breastfeeding arm sling innovation has been designed and tailored by  
192 using spandex for the sleeves, filled with elastic and attached with 6 cm leather, see  
193 Fig. 2. The spandex used for both arm wear is 5.0 cm. apart and has two straps that

194 are 63 x 7.5 cm. Both ends of the spandex are attached to Velcro straps in two  
195 positions to allow adjustment of the size according to the baby's size.

## 196 **Fig 2. This is the Fig 2 Title. Breastfeeding arm sling innovation**

197 In the first step of applying the support equipment, the midwives (research  
198 assistants) helped the mother to wear the sheath of the breastfeeding arm sling  
199 innovation and wrap the equipment around the baby. When the baby was latched on  
200 and feeding, the midwives (research assistants) helped the mother to adhere the  
201 equipment for a firm hold, so that the mother's arm touched closely the baby's back to  
202 support breastfeeding. This technique helped the mother's arm to touch the baby's  
203 back, therefore enabling her to hold the newborn baby closer. An advantage of this  
204 approach is that it prevents fatigue of the wrists and shoulders of the mothers during  
205 breastfeeding.

206 As this research is in the experimental stage, a helper was required to support  
207 how to apply the breastfeeding arm sling innovation. This initial help to use the  
208 breastfeeding arm sling innovation showed mothers how to apply and use the  
209 breastfeeding arm sling by themselves for further breastfeeding (Fig 2).

## 210 **Statistical analysis**

211  
212 All data analysis was performed using the IBM SPSS Statistics 27.0.1.0  
213 software package [18]. Data were expressed as means and standard deviations (SD).  
214 A comparison of the means of the two groups within subjects was evaluated for  
215 significance using paired t-tests. A p-value of less than 0.05 was considered  
216 significant.

## 217 **Ethical considerations**

218

219 The study was approved by the Ethics Committee on Human Subjects of the  
220 Faculty of Medicine at Ramathibodi Hospital, Mahidol University, Thailand (IRB COA.  
221 MURA2021/949), in line with the Human Research Protection such as Declaration of  
222 Helsinki, The Belmont Report, and the International Conference on Harmonization in  
223 Good Clinical Practice (ICH-GCP).

## 224 **Results**

### 225 **Participants' demographic characteristics**

226 A total of 46 postpartum women participated in the study ranging in age from  
227 19 to 40 years with a mean age of 29 years (SD = 5.65). Gestational age ranged from  
228 37-41 weeks (mean gestational age 38 weeks, SD = 1.09 weeks). Mothers who  
229 participated in the study were post-birth on their first day n = 18 (54.5 %), second day  
230 n= 9 (27.3 %), and third day n=6 (18.2%). The babies of the participants had a mean  
231 weight of 3151 grams.

### 232 **Differences in the effectiveness of breastfeeding observed** 233 **by mothers between groups**

234 The results of paired t-tests showed that the effectiveness of breastfeeding  
235 reported by mothers between using a normal cross-cradle hold position and using a  
236 cross-cradle hold position with breastfeeding arm sling innovation was statistically  
237 significantly different ( $t = 4.32$ ,  $P < 0.001$ ). The difference in total scores of using  
238 breastfeeding arm sling innovation and normal breastfeeding was statistically  
239 significant (hold the baby securely without slipping:  $t=5.68$ ,  $p<0.001$ ; feeling no pain at  
240 the nipples while the baby is suckling:  $t=4.76$ ,  $p <0.001$ ; baby can continue to suck:  
241 ( $t=2.09$ ,  $p <0.001$ ); baby held close to mother's body:  $t=5.76$ ,  $p <0.001$ ; No pain felt at

242 the breast during sitting to breastfeed continuously:  $t=4.24$ ,  $p < 0.001$ ), as presented  
 243 in table 1.

244 **Table 1. Comparison of the effectiveness of breastfeeding between using**  
 245 **normal cross-cradle hold position and using cross-cradle hold position with**  
 246 **breastfeeding arm sling innovation by mothers**

| Effectiveness of breastfeeding                                          | Using breastfeeding arm sling innovation equipment |      | Normal breastfeeding |      | t    | p-value |
|-------------------------------------------------------------------------|----------------------------------------------------|------|----------------------|------|------|---------|
|                                                                         | MEAN                                               | SD   | MEAN                 | SD   |      |         |
| 1. Hold the baby tightly without slipping                               | 3.24                                               | 0.67 | 2.20                 | 1.02 | 5.68 | <0.001  |
| 2. The feeling of no pain at the nipples while the baby is suckling     | 2.63                                               | 0.74 | 2.04                 | 0.89 | 4.76 | <0.001  |
| 3. Baby can continue to suck                                            | 3.02                                               | 0.86 | 2.33                 | 0.97 | 2.09 | <0.001  |
| 4. Baby held close to mother's body                                     | 3.28                                               | 0.78 | 2.24                 | 1.08 | 5.76 | <0.001  |
| 5. No pain felt at the breast during sitting to breastfeed continuously | 2.65                                               | 0.77 | 1.96                 | 0.89 | 4.24 | <0.001  |
| Total                                                                   | 2.97                                               | 0.60 | 2.15                 | 0.80 | 4.32 | <0.001  |

247

248 **Differences in the effectiveness of breastfeeding observed**  
 249 **by midwives between groups**

250 Table 2 shows the effectiveness of breastfeeding observed by the midwife  
 251 and indicates a significant difference in the effects of signs of baby attached during  
 252 breastfeeding between normal breastfeeding and using breastfeeding arm sling  
 253 innovation in all outcomes. Compared with normal breastfeeding, using  
 254 breastfeeding arm sling innovation increased significantly as greater areola seen  
 255 above the baby’s top lip (t = 6.03, p <0.001); baby’s chin touches breast (t = 6.26, p  
 256 <0.001); baby’s head and body in line (t = 7.46, p <0.001); baby’s mouth open wide  
 257 (t = 6.49, p <0.001); baby’s cheeks do not dimple during breastfeed (t = 7.29, p  
 258 <0.001).

259 **Table 2. Comparison of the effectiveness of breastfeeding between using**  
 260 **normal cross-cradle hold position and using cross-cradle hold position with**  
 261 **breastfeeding arm sling innovation by midwife (researcher assistance)**

| Effectiveness of breastfeeding           | Using breastfeeding arm sling innovation equipment |      | Normal breastfeeding |      | t    | p-value |
|------------------------------------------|----------------------------------------------------|------|----------------------|------|------|---------|
|                                          | MEAN                                               | SD   | MEAN                 | SD   |      |         |
| 1. More areola seen above baby’s top lip | 2.93                                               | 0.77 | 2.22                 | 0.59 | 6.03 | <0.001  |
| 2. Baby’s chin touches breast            | 3.08                                               | 0.66 | 2.34                 | 0.71 | 6.26 | <0.001  |

|                                                     |      |      |      |      |      |        |
|-----------------------------------------------------|------|------|------|------|------|--------|
| 3. Baby's head and body in line                     | 3.24 | 0.77 | 2.04 | 0.87 | 7.46 | <0.001 |
| 4. Baby's mouth open wide                           | 3.24 | 0.82 | 2.37 | 0.77 | 6.49 | <0.001 |
| 5. Baby's cheeks do not dimple during breastfeeding | 3.30 | 0.76 | 2.48 | 0.72 | 7.29 | <0.001 |
| Total                                               | 3.16 | 0.64 | 2.29 | 0.59 | 8.93 | <0.001 |

262

263 **Mothers' satisfaction using breastfeeding arm sling**  
 264 **innovation**

265 The majority of the mothers were satisfied with the suitability of using the  
 266 breastfeeding arm sling innovation design (52.9%, size and length 44.1% and fabric  
 267 used 41.2%). While half (50%) of the mothers were satisfied with the appearance of  
 268 the breastfeeding arm sling innovation, (41.2%) reported that they were very satisfied  
 269 with the non-slippage. Meanwhile, satisfied level of the features of easy to use  
 270 (41.2%), ease of disassembly (41.2%), and ease of cleaning (38.2%) were reported  
 271 by the mothers (Table 3).

272 **Table 3. Mothers' satisfaction using breastfeeding arm sling innovation**

| How satisfied are you with using the breastfeeding arm sling innovation | Satisfaction levels (%) |           |         |             |                  |
|-------------------------------------------------------------------------|-------------------------|-----------|---------|-------------|------------------|
|                                                                         | Very Satisfied          | Satisfied | Neutral | Unsatisfied | Very Unsatisfied |
| <b>Easy-to-use features</b>                                             |                         |           |         |             |                  |
| 1) Easy to use                                                          | 17.6                    | 41.2      | 35.3    | 2.9         | 2.9              |



|                                                                  |      |      |      |      |  |
|------------------------------------------------------------------|------|------|------|------|--|
| 2)Non slippage                                                   | 41.2 | 41.2 | 17.6 |      |  |
| 3)Easy to disassemble                                            | 5.9  | 41.2 | 41.2 | 11.8 |  |
| 4)Easy to clean                                                  | 38.2 | 38.2 | 23.5 |      |  |
| <b>Suitability of equipment</b>                                  |      |      |      |      |  |
| 5)Design                                                         | 14.7 | 52.9 | 29.4 | 2.9  |  |
| 6) Size and length                                               | 26.5 | 44.1 | 26.5 | 2.9  |  |
| 7) Beauty                                                        | 11.8 | 50.0 | 35.3 | 2.9  |  |
| 8) Fabric used                                                   | 32.4 | 41.2 | 23.5 | 2.9  |  |
| <b>Trial-ability</b>                                             |      |      |      |      |  |
| 9)The ability to hold a baby to breastfeed                       | 35.3 | 41.2 | 17.6 | 5.9  |  |
| 10)Ease of carrying a baby                                       | 35.3 | 41.2 | 17.2 | 5.9  |  |
| 11)Pain in the arm while holding the baby                        | 35.3 | 29.4 | 23.5 | 11.8 |  |
| 12)Tension in the wrist while holding the baby                   | 20.6 | 44.1 | 26.5 | 8.8  |  |
| <b>Observability</b>                                             |      |      |      |      |  |
| 13)Satisfaction with the use of the innovation for breastfeeding | 32.4 | 38.2 | 23.5 | 5.9  |  |
| 14)Feelings of Confidence in Breastfeeding                       | 38.2 | 35.3 | 20.6 | 5.9  |  |

273

274 Regarding the trial-ability, (44.1%) of mothers reported the breastfeeding arm sling

275 innovation helped to reduce tension in the wrist while holding the baby. Mothers

276 reported that they were satisfied with their ability to hold their baby to breastfeed

277 (41.2%) and ease of carrying baby (41.2%). Overall, (32.4%) of mothers felt very  
278 satisfied with the use of breastfeeding arm sling innovation and (38.2%) reported  
279 feeling confident in breastfeeding.

## 280 **Discussion**

281 The development of innovations model is a new concept in the nursing and  
282 midwifery process for developing, improving, and adapting products or procedures to  
283 significantly benefit outcomes [10]. Results of the present study show the clinical  
284 usefulness of the breastfeeding arm sling innovation in supporting breastfeeding. The  
285 findings from this current study showed that mothers and midwives reported the  
286 effectiveness of breastfeeding between using a normal cross-cradle hold position and  
287 using a cross-cradle hold position with breastfeeding arm sling innovation was  
288 statistically significantly different in all-term supports ( $t= 4.32$ ,  $p <0.001$ ) included  
289 holding the baby so that their face touched the mother's breast, their head and body  
290 was in alignment with their mother's breast, mouth wide open, and more of the areola  
291 was visible above the baby's top lip than below the lower lip. These findings are in  
292 accordance with Rahim et al. study, who emphasised success of the breastfeeding  
293 process depends on the accuracy of the position and attachment of the baby to the  
294 mother's breast and the ability of the baby to suck [19].

295 For a good attachment and effective breastfeeding, the baby's body positioning and  
296 latching technique are crucial [9]. Improper latch and inappropriate infant positioning  
297 can cause nipple pain and trauma [20]. Results from this current study demonstrate  
298 that the breastfeeding arm sling innovation helped mothers to breastfeed and  
299 decreased the feeling of pain at the nipples while the baby was latched on and feeding.  
300 This significant improvement in comfort helped to encourage continued breastfeeding.

301 The use of an innovative breastfeeding arm sling helped the mothers who participated  
302 in this study to hold the baby's body without any slipping during breastfeeding so that  
303 the baby's mouth and head were in a position in alignment with the nipple. Correct  
304 positioning and attachment of newborns during breastfeeding was one of the  
305 recommendations by Kent et al. [21], to help reduce nipple pain, increase the duration  
306 of breastfeeding, and reduce breastfeeding problems.

307 Breastfeeding can be challenging for first-time mothers who have little experience of  
308 breastfeeding and newborns who have not yet learned how to properly latch on to the  
309 breast [11]. The current study's results show that the breastfeeding arm sling  
310 innovation helped mothers feel less pain in the arm while holding the baby and sitting  
311 to breastfeed continuously. The study's findings are consistent with previous research  
312 demonstrating that innovations can address patient demands or help solve problems,  
313 leading to better outcomes for patients [10]. The first-time mothers in this study valued  
314 the breastfeeding arm sling innovation and felt very satisfied as it helped them feel  
315 comfortable during breastfeeding. This may be due to the breastfeeding arm sling  
316 innovation fitting the mother's arm to promote a correct position and enabling her to  
317 touch the newborn baby's back so that she can hold her baby closer during  
318 breastfeeding. Given the appropriate posture during breastfeeding, the breastfeeding  
319 arm sling innovation is considered acceptable among first-time mothers, with most  
320 mothers using it and reporting more confidence in breastfeeding.

321 The breastfeeding arm sling innovation was reported to have very satisfactory features  
322 due to its non-slipping benefit. With the features of easy to use and disassemble,  
323 however, this breastfeeding arm sling innovation required assistance to help mothers  
324 apply the equipment, wrapping it around the baby in order to support the correct  
325 position when the baby was breastfeeding. Self-application needs to be factored in

326 when considering the development of the breastfeeding arm sling innovation in the  
327 future to help mothers breastfeed independently.

328 A strength of this study is that mothers were very willing to participate in the  
329 study and this is also reflected in the high levels of satisfaction reported. Midwife  
330 assessors had preparatory training to assist mothers who agreed to participate.  
331 However, the assessors were known to the mothers, and this may have influenced  
332 their views and experiences positively or negatively as continuity of care is beneficial  
333 but may also have an impact on outcomes. The quasi-experimental study design  
334 allowed the participants to be their own control group, but findings are self-reported  
335 and must be viewed cautiously. The research study used a non-randomised design,  
336 therefore, other confounding factors not controlled for may have influenced the  
337 findings and therefore this limits the inference of the research results. Another  
338 limitation concerning this study was that it was limited to only first-time mothers, which  
339 makes it difficult to generalise the findings to other groups of childbearing women.  
340 Since the breastfeeding arm sling innovation in the present study applies to term  
341 newborn babies, future development would need to consider investigation as to  
342 whether preterm and differences in the baby weights would achieve similar results as  
343 reported in the present study.

## 344 **Conclusions**

345 The development of innovations model in nursing is a new concept in the  
346 nursing process for developing, improving, or adapting products or procedures to  
347 significantly benefit outcomes and respond directly to patient needs. The  
348 breastfeeding arm sling breastfeeding innovation contributes to the effectiveness of  
349 breastfeeding by assisting and supporting the mother and baby's position to

350 breastfeed more comfortably. In conclusion, this study provides emerging evidence  
351 that the breastfeeding arm sling assisted first-time mothers to feel comfortable,  
352 confident, and helped them to continue breastfeeding. However, further research is  
353 required to confirm or refute these initial findings.

## 354 **Acknowledgments**

355 The authors would like to gratefully thank the Faculty of Medicine, Ramathibodi  
356 Hospital, Mahidol University for their support grant and all the participants who took  
357 part in the present study.

358 **Funding Sources:** Ramathibodi School of Nursing Funds, Faculty of  
359 Medicine, Ramathibodi Hospital, Mahidol University, Thailand

## 360 **References**

- 361 1. World Health Organization [Internet]. Breastfeeding. [cited 2021 August 23].  
362 Available from: <https://www.who.int/health-topics/breastfeeding>.
- 363 2. World Health Organization [Internet]. Infant and young child feeding: Model  
364 Chapter for Textbooks. c2009 - [cited 2021 August 23]. Available: [http://](http://www.who.int/inf.htm)  
365 [www.who.int/inf.htm](http://www.who.int/inf.htm).
- 366 3. National Statistical Office Thailand [Internet]. Summary of Key Indicators June  
367 2020. c2019- [cited 2021 August 23]. Available from:  
368 <https://www.unicef.org/thailand/>.
- 369 4. Antonakou A, Papoutsis D. Cesarean Section and Breastfeeding Outcomes.  
370 In: Tsikouras P, Nikolettos N, Rath W, Tempelhoff GFV, editors. Current  
371 Topics in Caesarean Section [Internet]. London: IntechOpen; 2021. pp.35-46.

- 372 5. Sri Widiastuti IAK, Rustina Y, Efendi D. The use of breastfeeding pillow to  
373 reduce discomfort for breastfeeding mothers. *Pediatric Reports*.  
374 2020;12(s1):8702.
- 375 6. Thepha T, Marais D, Bell J, Muangpin S. Facilitators and barriers to exclusive  
376 breastfeeding in Thailand: a narrative review. *J Comm Pub Health Nurs*.  
377 2017;3(1):1-9
- 378 7. Chang P-C, Li S-F, Yang H-Y, Wang L-C, Weng C-Y, Chen K-F, et al. Factors  
379 associated with cessation of exclusive breastfeeding at 1 and 2 months  
380 postpartum in Taiwan. *International Breastfeeding Journal*. 2019;14(1):1-7.
- 381 8. Hackman NM, Schaefer EW, Beiler JS, Rose CM, Paul IM. Breastfeeding  
382 outcome comparison by parity. *Breastfeeding Medicine*. 2015;10(3):156-62.
- 383 9. Joshi H, Magon P, Raina S. Effect of mother–infant pair's latch-on position on  
384 child's health: A lesson for nursing care. *Journal of family medicine and*  
385 *primary care*. 2016;5(2):309.
- 386 10. Aoki M, Suzuki S, Takao H, Ikarashi F. Pain related to breastfeeding in seated  
387 and side-lying positions: Assessment and recommendations for improved  
388 guidance. *Journal of Ergonomic Technology*. 2017;7:43-59.
- 389 11. Jia Choo P, Ryan K. A qualitative study exploring first time mothers'  
390 experiences of breastfeeding in Singapore. *Proceedings of Singapore*  
391 *Healthcare*. 2016;25(1):5-12.
- 392 12. Reichardt CS. *Quasi-experimentation: A guide to design and analysis*:  
393 Guilford Publications; 2019.
- 394 13. Nelson AM. Risks and Benefits of Swaddling Healthy Infants: An Integrative  
395 Review. *MCN Am J Matern Child Nurs*. 2017;42(4):216-25.

- 396 14. Yoorat Y, Punyavachira P (2015). การทำกิจกรรมเพื่อส่งเสริมความผูกพันระหว่างมารดา-ทารกโดยเร็ว  
397 และการให้นมแม่ครั้งแรกในห้องคลอด โรงพยาบาลรามมาธิบดี. Thailand. Ramathibodi Nursing  
398 Journal, 20(3), 304–313. Available from: [https://he02.tci-](https://he02.tci-thaijo.org/index.php/RNJ/article/view/18513)  
399 [thaijo.org/index.php/RNJ/article/view/18513](https://he02.tci-thaijo.org/index.php/RNJ/article/view/18513)
- 400 15. Rogers EM, Singhal A, Quinlan MM. Diffusion of innovations. An integrated  
401 approach to communication theory and research: Routledge; 2014. p. 432-48.
- 402 16. Nardi PM. Doing survey research: A guide to quantitative methods:  
403 Routledge; 2018.
- 404 17. Cohen J. Statistical Power Analysis. Current Directions in Psychological  
405 Science. 1992;1(3):98-101.
- 406 18. IBM Corp. IBM SPSS Statistics for Windows [Internet]. Armonk, NY: IBM Corp;  
407 2017. Available from: <https://hadoop.apache.org>
- 408 19. Rahim F, Muhammad J, Ali S, Amir S. Breastfeeding practices in neonatal  
409 units. Journal of Medical Sciences. 2014;22(4):159-63.
- 410 20. Spencer J, Abrams S, Drutz J, Hoppin A. Common problems of breastfeeding  
411 and weaning. UpToDate. 2015. Available from: [http://www.uptodate](http://www.uptodate.com/home)  
412 [com/home](http://www.uptodate.com/home).
- 413 21. Kent JC, Prime DK, Garbin CP. Principles for maintaining or increasing breast  
414 milk production. Journal of Obstetric, Gynecologic & Neonatal Nursing.  
415 2012;41(1):114-21.

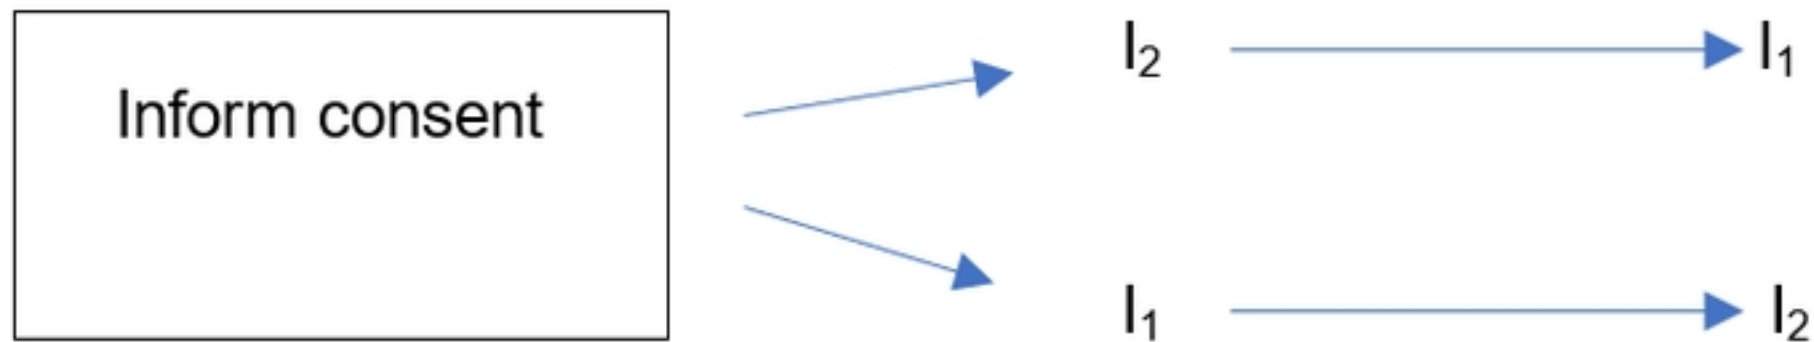

$I_1$  = Normal cross-cradle hold position with a pillow

$I_2$  = Breastfeeding arm sling innovation with cross-cradle hold position

Figure



## Design of breastfeeding arm sling innovation

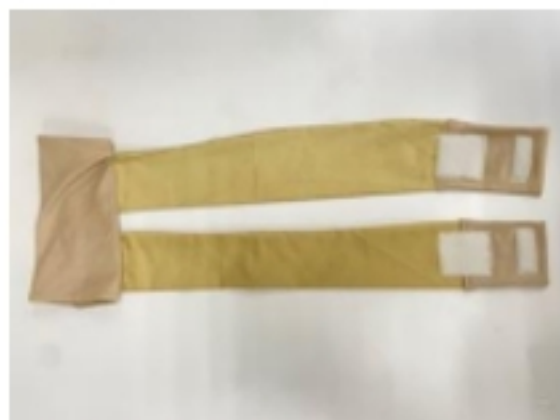

Step 1: Wearing the sheath of the breastfeeding arm sling innovation and wrap the equipment around the baby

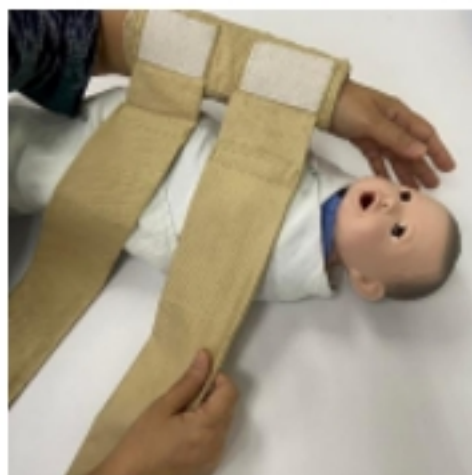

Step 2: When the baby is sucking, the midwives (research assistants) help the mother to adhere the equipment to itself for a firm hold

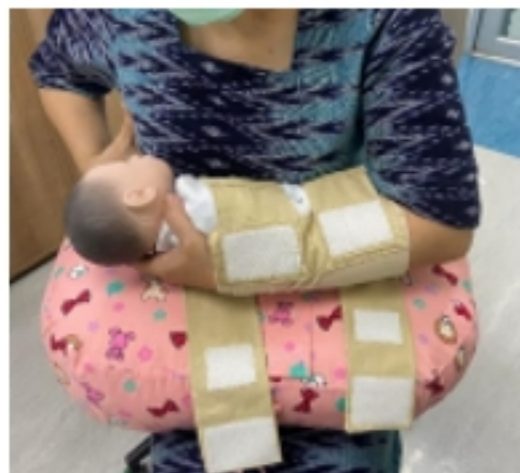

During using breastfeeding arm sling innovation

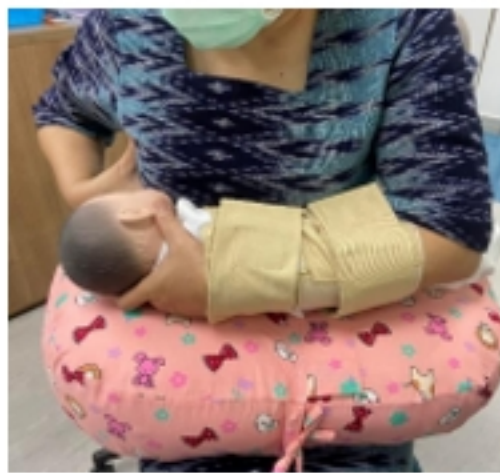

Figure
